# Supplementary material for: Eight biomarkers on a novel strip for early diagnosis of acute myocardial infarction
Source: Royal Society of Chemistry journal article supplement (doi:10.1039/c9na00644c), 2019-12-17
Supplement: c9na00644c1.pdf [file c9na00644c1.pdf]

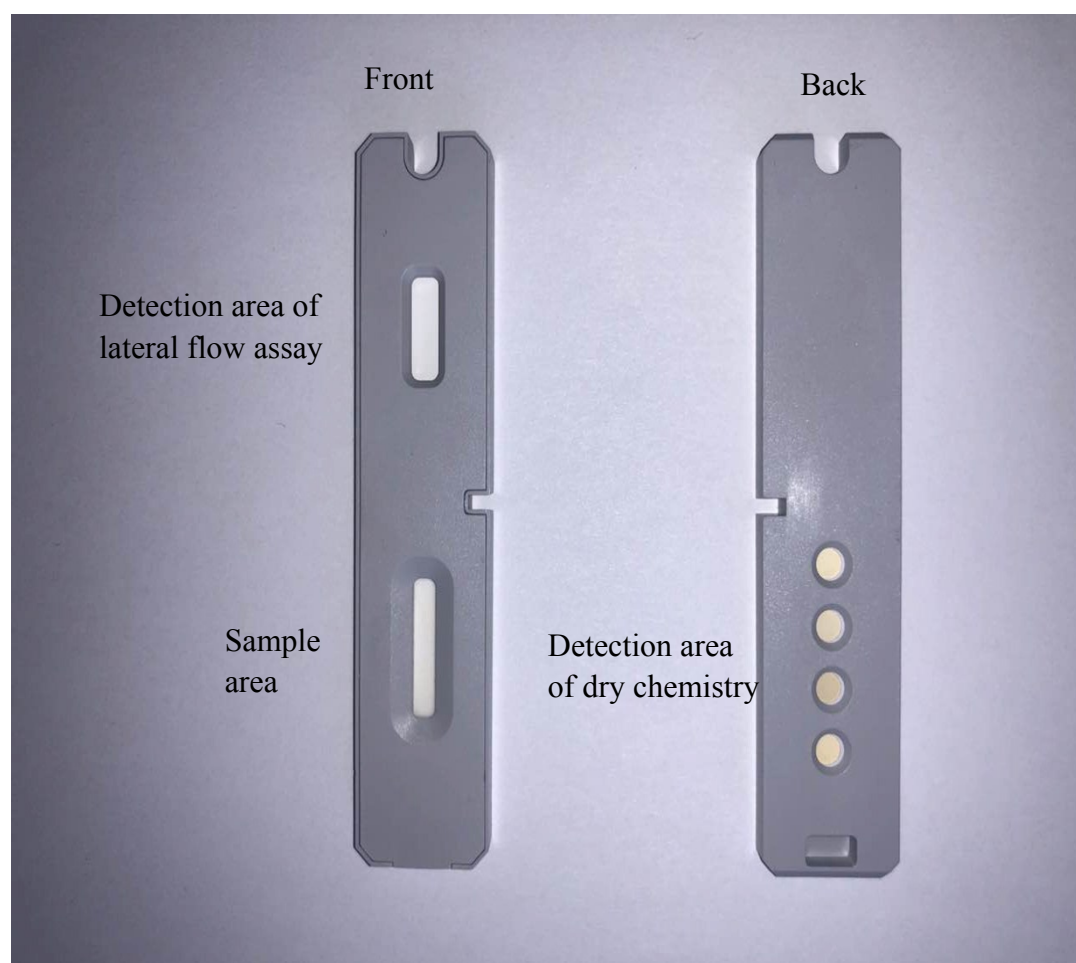

Figure S1 Actual picture of reagent strip

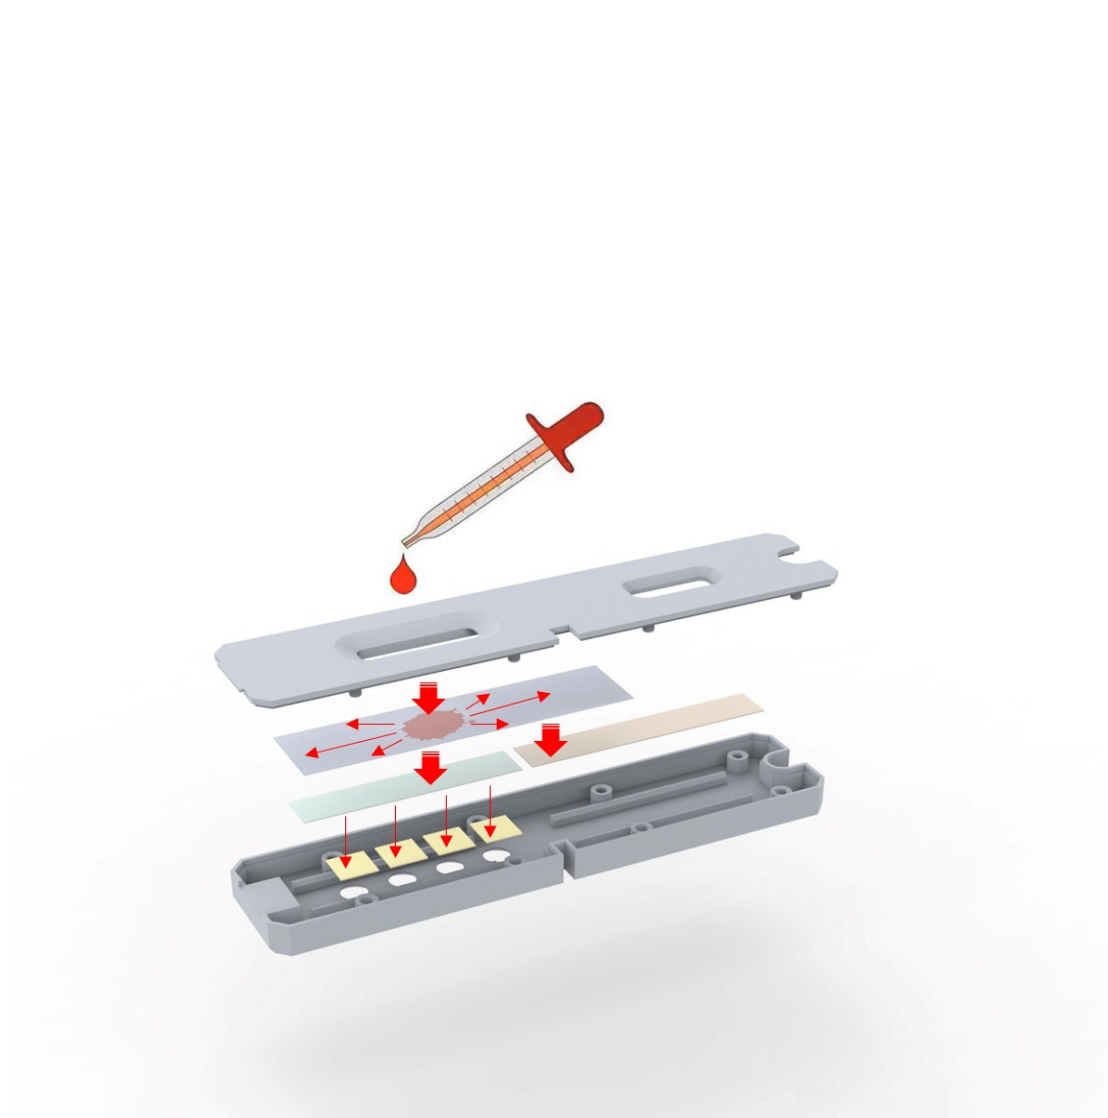

Figure S2 Schematic drawing of the strip device
